# Supplementary material for: Involvement of Per-Arnt-Sim Kinase and Extracellular-Regulated Kinases-1/2 in Palmitate Inhibition of Insulin Gene Expression in Pancreatic β-Cells
Source: Oxford University Press journal article supplement (doi:10.2337/db08-0579), 2009-06-05
Supplement: db08-0579_online_appendix.doc [file db08-0579_online_appendix.doc]

**Supplemental Table 1.** Primer sequences for RT-PCR.

| Gene | Primers Sequences (5’-3’) |
| --- | --- |
| rINS2 | Fwd: AAGCTCTCTACCTGGTGTGTGG  Rev: GTAGAGAGAGCAGATGCTGGTG |
| Pre-rINS2 | Fwd: AGCGTGGATTCTTCTACACACC  Rev: AAGGATTCTCACTCCTTCTTGG |
| rCyclophillin | Fwd: CTTGCTGCAGACATGGTCAAC  Rev: GCCATTATGGCGTGTGAAGTC |
| rIAPP | Fwd: CGCAGGATGGACACTAATGA  Rev: GCAGTGGCAGCAATAACAGA |
| Pre-rIAPP | Fwd: ATCTGTTATTGCTGCCACTGC  Rev: AACCACCTCCTTCAGTTCTGG |
| rINS1 | Fwd: GCTCTGTACCTGGTGTGTGG  Rev: GTGCCAAGGTCTGAAGATCC |
| rGlucokinase | Fwd: GGATGCAGAAGGAGATGGACC  Rev: GTCTCCGACTTCTGAGCCTTC |
| rGLUT2 | Fwd: AGCCAGCCTGTGTATGCAACC  Rev: AGTCCCAGCGACATGAAGACG |
| rPASK | Fwd: ATCTCCTGTGTGGAACTTGTCC  Rev: TGTGATGGAGTTCTGTCTGTCC |
| rMafA | Fwd: AGCAAGGAGGAGGTGATCC  Rev: ATCTCCTGCTTGAGGTGGTC |
| rPDX-1 | Fwd: GAACCGGAGGAGAATAAGAGG  Rev: AGTCAAGTTGAGCATCACTGC |
| rC/EBP | Fwd: CAAGCTGAGCGACGAGTACA  Rev: CAGCTGCTCCACCTTCTTCT |
| hPASK | Fwd: GGAGGATTGTTGGATTGAGG  Rev: CATCACAAGCTGGAAGAACC |
| mINS2 | Fwd: TGGAGGCTCTCTACCTGGTG  Rev: TCTACAATGCCACGCTTCTG |
| Pre-mINS2 | Fwd: TGTGTCCATCCATGACCAGT  Rev: CAGTGCCAAGGTCTGAAGGT |
| m-actin | Fwd: CATGGATGACGATATCGCTGC  Rev: GTACGACCAGAGGCATACAGG |
| mPASK | Fwd: TACTTCCTGCTGCTCCTTGC  Rev: TCTCTGTGGTCTTGGCATCC |
| mMafA | Fwd: GTGCTGGAGGATCTGTACTGG  Rev: ATGGTGGTGATGGTGATGG |
| mPDX-1 | Fwd: GGTATAGCCGGAGAGATGC  Rev: CTGGTCCGTATTGGAACG |
| mC/EBP | Fwd: CAAGCTGAGCGACGAGTACA  Rev: CAGCTGCTCCACCTTCTTCT |

**Supplemental Figure 1: Caspase 3 cleavage in MIN6 cells.** Representative immunoblots for cleaved caspase 3 and the p85 sub-unit of PI3K, as a loading control, in MIN6 exposed for 24h to 2 mM glucose, 11 mM glucose ± 0.5 mM palmitate, 2 µM thapsigargin, or 200 ng/ml IL-1.

**Supplemental Figure 2.** **AO/PI staining in islets.** Rat islets were exposed for 24h to 2.8 mM glucose **(A)** or 16.7 mM glucose + 0.5 mM palmitate **(B)**. Rat islets infected with adenoviruses expressing Luc **(C)**, WT hPASK **(D),** or KD hPASK **(E)** were cultured for 24h with 16.7 mM glucose + 0.5 mM palmitate. **(F)**: Islets were exposed for 4h to 100 µM H2O2. Islets were stained with acridine orange (AO; green, viable cells) and propidium iodide (PI; red, dead cells) and examined by confocal microscopy.
